# Supplementary material for: Evaluating PI-RADS lesions and clinically significant prostate cancer in Black and Asian men: a PREVENT randomized clinical trial secondary analysis.
Source: Research Square preprint supplement (doi:10.21203/rs.3.rs-6905600/v1), 2025-07-04

**Supplementary material**

Supplementary Methods 1: Original PREVENT Trial Protocol

Supplementary Table 1: Collaborators by Institution

Supplementary Table 2: Investigator Biopsy Experience and Biopsy Technique

Supplementary Table 3: Details on Infection Adverse Events

Supplementary Table 4: Details on Non-Infection Adverse Events

Supplementary Table 5: Details on Protocol Violations

Supplementary Table 6: Accruals by type of consent

Supplementary Figure 1: Original PREVENT Trial CONSORT Diagram

Supplementary Methods 1. Original PREVENT Trial Protocol

The trial protocol was approved by the institutional review board at study sites and [Biomedical Research](https://www.sciencedirect.com/topics/medicine-and-dentistry/biomedical-research) Alliance of New York 18-02-365. The trial biostatistician (M.A.) analyzed the data. No commercial entity was involved in the trial. The trial was funded by the National Cancer Institute, which was not involved in protocol development, data analysis or interpretation, or manuscript preparation. Deviations were monitored by the New York Presbyterian Weill Cornell Medicine (NYP-WCM) Data Safety Monitoring Committee.

We assumed one infection (0.4%) in the transperineal arm and a 5% infection risk in the transrectal arm. We estimated that randomization with 236 patients per arm would provide 80% power to reject the null hypothesis of no difference in infections, given a two-sided α of 0.05. The sample size was increased to 530 to allow for 10% withdrawal and loss to follow-up.

From March 2021 through May 2023, patients were recruited at ten centers and were eligible for enrollment if they had not undergone prior [prostate biopsy](https://www.sciencedirect.com/topics/medicine-and-dentistry/prostate-biopsy), had an elevated [PSA](https://www.sciencedirect.com/topics/medicine-and-dentistry/prostate-specific-antigen) level and/or abnormal [digital rectal examination](https://www.sciencedirect.com/topics/medicine-and-dentistry/digital-rectal-examination), and had suspicious prostate magnetic resonance imaging (MRI) characteristics (Prostate Imaging Reporting and Data System, version 2.1 scores 3–5). A small number of participants had biopsy without MRI (claustrophobia and metal prosthesis) and were included as our primary outcome was infection. The exclusion criteria included [acute prostatitis](https://www.sciencedirect.com/topics/medicine-and-dentistry/prostatitis) in the last 6 mo or any current bacterial infection requiring antibiotic treatment. There have been no significant methodological (eligibility or outcomes) changes following trial commencement.

We used two-stage [informed consent](https://www.sciencedirect.com/topics/medicine-and-dentistry/informed-consent), although in some sites performing predominantly transperineal biopsy, traditional one-stage consent was used. Research coordinators implemented the assignment sequence, which used randomly permuted blocks of unequal size stratified by the urologist and PSA (<4, 4–9.9, and ≥10 ng/ml), through central password-protected, web-based randomization, ensuring that allocation could not be predicted before or modified after randomized. Allocation was not blinded to researchers or participants.

A rectal culture to screen for fluoroquinolone-resistant organisms was obtained prior to transrectal biopsy, and targeted [antibiotic prophylaxis](https://www.sciencedirect.com/topics/medicine-and-dentistry/antibiotic-prophylaxis) was administered. In the absence of resistance, [fluoroquinolone](https://www.sciencedirect.com/topics/medicine-and-dentistry/quinolone-derivative) prophylaxis was administered; an alternative based on culture sensitivities was used for participants allergic to fluoroquinolones. In the 15% of participants with rectal culture–fluoroquinolone resistance, an alternative antibiotic was given based on sensitivities. No antibiotic prophylaxis was given for transperineal biopsy. Investigators followed the trial protocol–specified biopsy procedural approach and used the transperineal [local anesthetic](https://www.sciencedirect.com/topics/medicine-and-dentistry/local-anesthetic) approached described by Kubo et al. A maximum of 20 ml of 1% lidocaine was used for both approaches, with 12 systematic biopsy cores and three targeted cores per MRI region of interest.

Immediately after biopsy, participants completed a [numerical rating scale](https://www.sciencedirect.com/topics/medicine-and-dentistry/numeric-rating-scale) (0–10) assessment of pain, discomfort, and anxiety, with higher scores indicating greater symptom intensity.

In addition, we ascertained outcomes of interest through 7-d, because all infections, hospitalizations, and 99.9% postbiopsy adverse events requiring intervention (Common Terminology Criteria for Adverse Events v.5.0 of grade ≥2) occur within this time frame. Adverse events were followed until resolution. Infectious complications included uncomplicated urinary tract infection (UTI), complicated UTI, and [urosepsis](https://www.sciencedirect.com/topics/medicine-and-dentistry/urosepsis).

The secondary outcomes included bleeding requiring intervention and [urinary retention](https://www.sciencedirect.com/topics/medicine-and-dentistry/urinary-retention) captured through a combination of a prospective medical review and the 7-d survey. The 7-d survey comprised the general symptom items from the validated biopsy TRUS-BxQ instrument. Items queried for fevers, chills, UTIs, acute urinary retention, new medications, additional post biopsy healthcare encounters, and persistent pain and discomfort. If participants reported additional encounters, they were contacted to rule out adverse events treated at an outside facility. Healthcare providers were also queried regarding adverse events when reviewing biopsy pathology. We also compared the detection of clinically significant (grade group 2–5) and low-grade (grade group 1) cancer.

The primary analyses followed the intent-to-treat principles. We also performed planned per-protocol analyses by type of biopsy received after excluding 26 participants with protocol deviations. Multivariable [logistic regression](https://www.sciencedirect.com/topics/medicine-and-dentistry/logistic-regression-analysis) with site as a covariate was used to analyze the association between the randomization arm and infection, urinary retention, bleeding requiring intervention, and detection of clinically significant and insignificant cancer. Adjusted absolute risk differences were calculated using regression least-squares adjusted mean difference. However, due to the small number of significant adverse events, we were unable to adjust for site, and instead used Fisher’s exact test and estimated the difference in proportions along with the Newcombe hybrid score 95% confidence intervals (CIs).

We tested for a difference in biopsy pain, discomfort, and anxiety at biopsy, and pain and discomfort were compared from the 7-d survey. Categorical responses were analyzed as described above, and continuous responses were analyzed using the [analysis of covariance](https://www.sciencedirect.com/topics/medicine-and-dentistry/analysis-of-covariance) with randomization strata as covariates. All analyses were conducted using R version 4.2.2 with the tidyverse (v1.3.2), gtsummary (v1.6.3), and emmeans (v1.8.4.1) packages.

**Supplementary Table 1.** Collaborators by Institution.

| Institution | Consent approach | Authorship/Acknowledgments |
| --- | --- | --- |
| Weill Cornell Medicine, New York City, NY | Two-stage | Jim Hu, Chunmei McKernan, Sheri Cheng, Bouchra Benghomari, Siwen Xie, Thomas Flynn, Miko Yu |
| Northwestern Medicine, Chicago, IL | Two-stage | Edward Schaeffer, Ashley Ross, Shilajit Kundu, Hiten Patel, Anthony Schaeffer, Teresa Zembower, Margarita Mana-ay, Nikki Hubbard |
| Johns Hopkins Medicine, Baltimore, MD | One-stage | Mohammad Allaf, Andrew Cohen, Christian Pavlovich, Misop Han, Michael Rezaee, Claire de la Calle, Kyle Spradling, Ahmed Ghazi, Nirmish Singla, Eric Katz, Rana Harb, Tina Wlajnitz, Johnathan Shepard, Julia Faranetta |
| Memorial Sloan Kettering, New York City, NY | Two-stage | Behfar Ehdaie, Mireya Arango |
| University of Connecticut Health, Farmington, CT | One-stage | Benjamin T. Ristau, Melanie Klinck, Maria Clemencia Ortiz, Jillian McNamara, Katarzyna Nastri, Quratulain Ali, Vincent Rella, Madison Lowe, Juliette Dudek |
| University of Michigan | Two-stage | Jeffrey Montgomery, Sharada Lanka |
| MedStar Health at Georgetown University School of Medicine, Washington D.C. | One-stage | Keith Kowalczyk, Diana Shmul |
|  |  |  |
| University Health Hospital at Case Western Reserve University School of Medicine, Cleveland, OH | Two-stage | Jonathan Shoag, Lydia Beard, Adam Calaway |
|  |  |  |

**Supplementary Table 2.** Investigator self-reported biopsy experience by approach and trial biopsy volume.

| **Investigator** | **Transrectal biopsy** | | | **Transperineal biopsy** | | | | **Total Trial Volume** | | --- | |  | |
| --- | --- | --- | --- | --- | --- | --- | --- | --- | --- |
| Approach and Platform | Prior Experience | Trial Volume | Approach and Platform | Prior Experience | Trial Volume |
| Jim Hu | Artemis software fusion | 1500 | 112 | PrecisionPoint fusion* | 200 | 124 | 236 |
| Edward Schaeffer | UroNav software fusion | 2000 | 67 | PrecisionPoint fusion | 150 | 71 | 138 |
| Mohammad Allaf | UroNav software fusion | 1200 | 16 | UroNav software fusion | 500 | 13 | 29 |
| Behfar Ehdaie | Koelis software fusion | 2000 | 18 | Koelis software fusion | 500 | 7 | 25 |
| Andrew Cohen | Cognitive fusion | 300 | 1 | PrecisionPoint fusion | 75 | 24 | 25 |
| Benjamin Ristau | Cognitive fusion | 180 | 12 | Cognitive fusion | 120 | 9 | 21 |
| David Green | Cognitive fusion | 400 | 8 | PrecisionPoint fusion | 100 | 9 | 17 |
| JHM investigators† | Artemis software fusion | unknown | 6 | PrecisionPoint fusion | unknown | 5 | 11 |
| Michael Rezaee | UroNav software fusion | 300 | 8 | UroNav software fusion | 40 | 3 | 11 |
| Misop Han | UroNav software fusion | 3000 | 9 | UroNav software fusion | 50 | 2 | 11 |
| Christian Pavolvich | UroNav software fusion | 2000 | 5 | UroNav software fusion | 600 | 3 | 8 |
| John Graham | Navigo software fusion | 200 | 4 | PrecisionPoint fusion | 20 | 3 | 7 |
| Jeffrey Montgomery | UroNav software fusion | 800 | 5 | UroNav software fusion | 80 | 1 | 6 |
| Ashley Ross | UroNav software fusion | 1000 | 2 | PrecisionPoint fusion | 25 | 3 | 5 |
| Keith Kowalczyk | Cognitive fusion | 500 | 3 | PrecisionPoint fusion | 200 | 2 | 5 |
| Shilajit Kundu | UroNav software fusion | 300 | 1 | PrecisionPoint fusion | 100 | 3 | 4 |
| Patel Hiten | UroNav software fusion | 60 | 2 | UroNav software fusion | 10 | 1 | 3 |
| Gerald Wang | Artemis software fusion | 600 | 0 | PrecisionPoint fusion | 100 | 2 | 2 |
| Jonathan Shoag | UroNav software fusion | 100 | 0 | UroNav software fusion | 200 | 1 | 1 |
| Ahmed Ghazi | UroNav software fusion | 500 | 0 | UroNav software fusion | 150 | 1 | 1 |
| Nirmish Singla | UroNav software fusion | 150 | 1 | PrecisionPoint fusion | 8 | 0 | 1 |

UroNav Phillips; Andover, MA; Artemis Eigen; Grass Valley, CA; Koelis; Princeton, NJ; PrecisionPoint Perineologic; Cumberland, MD; Navigo UC-Care; Yokne'am Ilit, Israel

*PrecisionPoint fusion denotes cognitive fusion.

† Johns Hopkins Medicine investigators: Claire de la Calle, Kyle Spradling and Eric Katz left the institution.

**Supplementary Table 3.** Details of Infectious Complications.

| Subject | Rectal culture Findings | Prophylaxis | Presentation | Laboratory Results |
| --- | --- | --- | --- | --- |
| 1 | Sensitive to fluoroquinolone | ciprofloxacin | Fever to 102  Hospital admission through ER | Urine culture demonstrated >105 E. Coli sensitive ciprofloxicin  Blood culture negative |
| 2 | Sensitive to fluoroquinolone | ciprofloxacin | Fever to 102 seen by PCP | Urine culture negative  WBC 15.8,  Urine dip WBC 2+ |
| 3 | Resistant to Fluoroquinolone, sensitive to cefpodoxime | cefpodoxime | Fever to 103  Treated with IV hydration and antibiotics in ER | Urine culture demonstrated >105 E. Coli, sensitive to fluoroquinolone |
| 4* | Resistant to fluoroquinolone | trimethoprim-sulfamethoxazole  ceftriaxone | Fever to 104  Hospital admission through ER | Urine culture 10000-49000 CFU resistant to ciprofloxacin and ceftriaxone  Blood culture E Coli resistant to ciprofloxacin and ceftriaxone |

*Protocol violation because rectal swab culture did not yield sensitivity and resistance patterns.

PCP= primary care physician

CFU= colony forming units

**Trial Definitions of Infectious Complications**

Uncomplicated UTI: 1. Symptoms of dysuria, urgency, frequency, or hematuria

2. Pyuria and/or bacteriuria

3. No fever

Complicated UTI: 1. Symptoms of fever, flank pain, nausea/vomiting

2. Pyuria and/or bacteriuria

Sepsis: 1. Meets criteria for sepsis, severe sepsis, or septic shock

2. Evidence of urinary pathogen growth in urine or blood cultures

**Supplementary Table 4.** Non-Infectious biopsy Adverse Events.

| Bloody diarrhea over 2 days | Participant seen in the emergency room six days after transrectal prostate biopsy and CT scan revealed extravasation in the rectal region. Colonoscopy demonstrated a small l clot over the recent biopsy site, and a clip was placed. No transfusion was needed, and he was discharged after a two-day hospitalization for a CTCAE grade 3 adverse event. | Hematocrit 35.1 |
| --- | --- | --- |
| Urinary retention | Foley catheters were placed in the 3 transrectal and 1 transperineal biopsy patients, who could not urinate within four days of prostate biopsy. All passed voiding trials after 7-days for these CTCAE grade 2 adverse events. | NA |

**Supplementary Table 5.** Protocol violation details by subject and site.

| **Site** | **Randomization** | **Biopsy Approach** | **Protocol Violation** |
| --- | --- | --- | --- |
| NYP WCM | Transperineal | Transrectal | Received sulfamethoxazole-trimethoprim and ceftriaxone |
| NYP WCM | Transrectal | Transrectal | Received sulfamethoxazole-trimethoprim and ceftriaxone |
| NYP WCM | Transperineal | Transperineal | Received levofloxacin |
| NYP WCM | Transrectal | Transrectal | Received ceftriaxone; no resistance on rectal swab |
| NYP WCM | Transrectal | Transrectal | Received sulfamethoxazole-trimethoprim for no resistance on rectal swab |
| NYP WCM | Transperineal | Transperineal | Received levofloxacin |
| NYP WCM | Transperineal | Transperineal | Received levofloxacin |
| NYP WCM | Transperineal | Transperineal | Received levofloxacin and sulfamethoxazole-trimethoprim |
| NYP WCM | Transperineal | Transperineal | Received levofloxacin |
| NYP WCM | Transrectal | Transrectal | Received levofloxacin and gentamicin; no rectal swab results |
| NYP WCM | Transrectal | Transrectal | Received sulfamethoxazole-trimethoprim; no resistance on swab |
| NYP WCM | Transrectal | Transrectal | Received ceftriaxone; no resistance on rectal swab |
| NYP WCM | Transrectal | Transrectal | Received ceftriaxone; no resistance on rectal swab |
| NYP WCM | Transrectal | Transrectal | Received gentamicin and levofloxacin for negative swab |
| NYP WCM | Transrectal | Transrectal | Received ceftriaxone; no resistance on rectal swab |
| NYP WCM | Transrectal | Transperineal | Received levofloxacin and gentamicin; no rectal swab |
| Johns Hopkins | Transperineal | Transrectal | Received levofloxacin |
| Johns Hopkins | Transperineal | Transrectal | Received gentamicin |
| Johns Hopkins | Transrectal | Transperineal | Received minimal sedation |
| Johns Hopkins | Transperineal | Transperineal | History of prior negative biopsy |
| Johns Hopkins | Transperineal | Transperineal | Received ceftriaxone |
| NYP Brooklyn | Transrectal | Transrectal | Received ceftriaxone; no rectal swab |
| NYP Brooklyn | Transrectal | Transrectal | Received ceftriaxone; no resistance on rectal swab |
| NYP Brooklyn | Transrectal | Transrectal | Received gentamicin; no resistance on rectal swab |
| NYP Brooklyn | Transrectal | Transrectal | Received ceftriaxone; no resistance on rectal swab |
| NYP Brooklyn | Transrectal | Transrectal | Received ceftriaxone; no resistance on rectal swab |

**Supplementary Table 6.** Accrual by type of consent.

| **Type of consent** | **Number of accruing urologists** | **Total accrual** | **Accrual per urologist** |
| --- | --- | --- | --- |
| Two-stage | 12 | 473 | 39.4 |
| One-stage | 9 | 94 | 10.4 |

**Supplementary Figure 1.** CONSORT diagram showing the flow of participants through various stages of a randomized trial. MRI = magnetic resonance imaging.


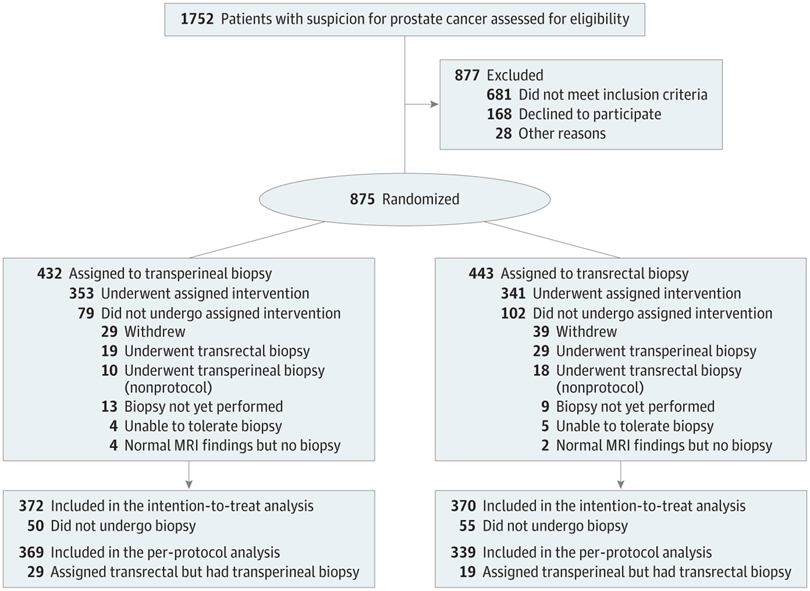

Supplement: Supplementary file 5 [file b5a34b98b9ff11ac9a3fa4fc.docx]
