# Supplementary material for: Evaluating PI-RADS lesions and clinically significant prostate cancer in Black and Asian men: a PREVENT randomized clinical trial secondary analysis.
Source: Research Square preprint supplement (doi:10.21203/rs.3.rs-6905600/v1), 2025-07-04
Supplement: Supplementary file 1 [file 43336c1f229b008933e4154a.xlsx]

## Sheet: Sheet1
Table 2. Detection of overall and clinically significant prostate cancer stratified by PI-RADS and race
	PI-RADS scorea	Asian	Black	White (n=414)	Overall	p-value
		(n=36)	(n=88)		(n=665)
All PCa
	3	0/7 (0)	14/20 (70)	43/100 (43)	72/153 (47)	0.004
	4	9/16 (56)	42/50 (84)	141/196 (72)	232/319 (73)	0.12
	5	13/13 (100)	18/18 (100)	113/118 (96)	184/193 (95)	0.4
Clinically Significant PCa
	3	0/7 (0)	12/20 (60)	20/100 (20)	41/153 (27)	0.003
	4	8/16 (50)	34/50 (68)	103/196 (53)	180/319 (56)	0.19
	5	11/13 (85)	17/18 (94)	100/118 (85)	165/193 (85)	0.8
aProstate Imaging Reporting and Data System
