# Supplementary material for: Evaluating PI-RADS lesions and clinically significant prostate cancer in Black and Asian men: a PREVENT randomized clinical trial secondary analysis.
Source: Research Square preprint supplement (doi:10.21203/rs.3.rs-6905600/v1), 2025-07-04
Supplement: Supplementary file 2 [file 6a8ddc0905a328136e2b535c.xlsx]

## Sheet: Sheet1
Table 3. Multivariable logistic regression of prostate cancer odds on biopsy for patients with PI-RADS 3-4 lesions.
	Variable	Odds Ratio (95%CI)	p-value
All PCa
	Age (per 1 year)	1.01 (1.01-1.01)	0.02
	PSADa
	<0.15	-
	³0.15	1.19 (1.09-1.29)	<0.001
	Biopsy Approach
	Transrectal	-
	Transperineal	1.00 (0.92-1.09)	0.9
	PI-RADSb
	3	-
	4	1.24 (1.14-1.36)	<0.001
	Race
	White	-
	Asian	0.79 (0.65-0.95)	0.01
	Black	1.17 (1.04-1.32)	0.009
Clinically Significant PCa
	Age (per 1 year)	1.01 (1.01-1.02)	<0.001
	PSADa
	<0.15	-
	³0.15	1.22 (1.12-1.33)	<0.001
	Biopsy Approach
	Transrectal	-
	Transperineal	0.99 (0.91-1.07)	0.8
	PI-RADSb
	3	-
	4	1.27 (1.16-1.39)	<0.001
	Race
	White	-
	Asian	0.94 (0.77-1.14)	0.5
	Black	1.20 (1.06-1.35)	0.004
aProstate-specific antigen density
bProstate Imaging Reporting and Data System
