# Supplementary material for: Evaluating PI-RADS lesions and clinically significant prostate cancer in Black and Asian men: a PREVENT randomized clinical trial secondary analysis.
Source: Research Square preprint supplement (doi:10.21203/rs.3.rs-6905600/v1), 2025-07-04
Supplement: Supplementary file 3 [file 790d2c112ab83645fe65c351.docx]

Logistic regression model formula:

logit(p) = β₀ + β₁ * Transperineal Biopsy + β₂ * Age+ β₃ * PSAD + β₄ * Asian Race + β₅ * Black race + β₆ * Other Race + β₇ * PI-RADS 4

Where:

- logit (p) is the log-odds probability of the outcome of clinically significant cancer.
- Transperineal biopsy is binary variable comparing transperineal to transrectal biopsy as reference group
- Age is continuous in years
- PSAD is continuous variable representing PSA density
- Asian, Black, and other race are categorical variables compared to White race as reference
- PI-RADS 4 is a categorical variable comparing a PI-RADS 4 score to PI-RADS score of 3 as a reference.

The outcome of interest will be odds ratios with the associated 95% confidence interval for those ratios.
