# Supplementary material for: Evaluating PI-RADS lesions and clinically significant prostate cancer in Black and Asian men: a PREVENT randomized clinical trial secondary analysis.
Source: Research Square preprint supplement (doi:10.21203/rs.3.rs-6905600/v1), 2025-07-04
Supplement: Supplementary file 4 [file 8541c4a4e25f52d796e901c9.docx]

**Statistical Analysis Plan (SAP)**

| **Title:** Evaluating PI-RADS lesions and clinically significant prostate cancer in Black and Asian men: a PREVENT randomized clinical trial secondary analysis | | |  |
| --- | --- | --- | --- |
| **CRU/Department/Division/Center:** Northwestern Department of Urology | | |  |
| **IRB Number:** BRANY ID # 18-02-365 | | |  |
| **Investigators:** | | |  |
| **Primary Investigator:** Edward M. Schaeffer, MD PhD | | |  |
| **Collaborative Lead:** Jim C. Hu, MD | | |  |
| **Co-authors (if known):** Conor B. Driscoll, MD, Nicole Handa, MD, Mitchell M. Huang, MD, Adam B. Murphy, MD, MPH | | |  |
| **Analysis Biostatistician(s):** Mitchell M. Huang, MD | | |  |
| **Subject Matter Expert:** Edward M. Schaeffer, MD PhD; Jim C. Hu, MD | | |  |
| **Original Creation Date:** 9/15/2024 | | |  |
| **Version Date:** 1.0  **Project Folder Location:** Northwestern OneDrive | | |  |
|  | | |  |
| **Project Goal(s):** Abstract submission to AUA, manuscript submission to peer-reviewed journal | | |  |
| **Submission Deadline(s):** Q1 2025  **SAP Creator Contact information**: conor.driscoll@northwestern.edu | | |  |
| **Investigator Agreement** | All statistical analyses included in an abstract or manuscript should reflect the work of the biostatistician(s) listed on this SAP. No changes or additional analyses should be made to the results or findings without discussing with the project biostatistician(s).  All biostatisticians on this SAP should be given sufficient time to review the full presentation, abstract, manuscript, or grant and be included as co-authors on any abstract or manuscript resulting from the analyses.  If substantial additional analysis is necessary or the aims of the project change, a new SAP will need to be developed.  Publications resulting from this SAP are supported in part by the Duke CTSA and must cite grant number UL1TR002553 and be submitted to PubMed Central.  I have reviewed the SAP and understand that any changes must be documented.  *Acknowledged by:* Conor B. Driscoll, Mitchell M. Huang, Edward M. Schaeffer, Jim C. Hu  *Date:* September 15, 2024 | | |
| **Activity Log** | *9/15/2024: SAP created* | | |
| **Acronyms** | *PCa* | *Prostate cancer* | |
|  | *RCT* | *Randomized controlled trial* | |
|  | *PSA*  *PI-RADS*  *MRI*  *PSAD*  *csPCa*  *TP*  *TR*  *PNB*  *mpMRI*  *GG* | *Prostate specific antigen*  *Prostate Imaging Reporting and Data System*  *Magnetic resonance imaging*  *Prostate specific antigen density*  *Clinically significant prostate cancer*  *Transperineal*  *Transrectal*  *Prostate needle biopsy*  *Multi-parametric magnetic resonance imaging*  *Grade group* | |

# Study Overview

Background/Introduction: Prostate cancer (PCa) is the most common solid malignancy in men, affecting 1 in 8 men in their lifetime. There is a significant differential in PCa disease burden by race in the United States with Black men experiencing younger age at PCa diagnosis, higher grade PCa at diagnosis, and higher PCa-specific mortality. Multiple theories exist in the literature as to why this health disparity exists, including access to care, genetic variations (such as CDKN1B deletions), and Vitamin D related molecular mechanisms. While many of these may contribute to the differences in PCa outcomes for Black men, none of these have been able to fully explain the disparity.

Another reason that has been well-documented across multiple fields of medicine, is that randomized controlled trials (RCT) tend to have poor accrual of non-White patients, which can prevent findings from being validated across racial groups and possibly lead to unintentional mismanagement of non-White patients. Over the past several decades, there has been significant attention directed to refine the evaluation of PSA testing to better balance detection of clinically significant cancer with harms associated with over-diagnosis. Although algorithms differ from institution to institution, many algorithms use serum PSA level and PI-RADS lesions on MRI as the main factors that determine when to biopsy a patient. Given that PSAD and PI-RADS were validated in a predominantly White population, it is possible that mis-calibration of these clinical factors could be contributing to PCa outcome disparities for Black men.

Similarly, Asian men remain under-represented in pivotal PCa trials. While the known disparities for Black men have generated a significant arm of research into the cause, there is a much smaller body of literature surrounding PCa in Asian men, a demographic that is growing rapidly in the United States. What data does exist, however, demonstrates lower rates of grade group (GG) 1 PCa detection and fewer positive biopsies for PI-RADS 3 lesions compared to non-Asian peers, suggesting a possible mis-calibration of current risk stratification tools for Asian men as well.

The PREVENT trial was a multi-institutional randomized controlled trial which compared infectious outcomes between transperineal (TP) and transrectal (TR) prostate needle biopsy (PNB). The study captured self-identified race and MRI lesion data with self-identifying Asian men representing 4.9% and self-identifying Black men representing 13.4% of the overall trial cohort, respectively. Here, we analyze biopsy outcomes for both self-identifying Black and Asian patients in the PREVENT trial with the hypothesis that MRI may not be appropriately calibrated for these populations.

## Study Aims

To analyze biopsy outcomes for both self-identifying Black and Asian patients in the PREVENT trial.

## Study Hypotheses

MRI may not be appropriately calibrated for PCa detection in Asian and Black men.

## Primary Hypotheses

The primary objectives of this study are:

1. To compare the rates of overall and clinically significant prostate cancer by PI-RADS lesion for Asian men
2. To compare the rates of overall and clinically significant prostate cancer by PI-RADS lesion for Black men

## Secondary Hypotheses

None

# Study Population

## Inclusion Criteria

- Patients randomly allocated to the PREVENT trial’s TP vs. TR PNB comparison were eligible for study. The first efficacy results from this comparison have been published previously. Briefly, from March 2021 through May 2023, patients were recruited at ten centers and were eligible for enrollment if they had not undergone prior PNB, had an elevated PSA level and/or abnormal digital rectal examination (DRE), and had suspicious prostate magnetic resonance imaging (MRI) characteristics (Prostate Imaging Reporting and Data System, version 2.1 14 scores 3–5). They were then randomized 1:1 to TP PNB without antibiotic prophylaxis or TR PNB with targeted antibiotic prophylaxis. All patients underwent multiparametric MRI (mpMRI) per study protocol prior to randomization. Reviewers were blinded to treatment allocation and outcomes as previously reported.13 A small number of participants had biopsy without MRI (claustrophobia and metal prosthesis) and were included in the original trial but were excluded from this secondary analysis as the primary outcome of this analysis is predicated on presence or absence of mpMRI PI-RADS lesions.
- Within this population, only those patients with a PI-RADS 3 or higher lesion were included

## Exclusion Criteria

- Acute prostatitis in the last 6 months or
- Any current bacterial infection requiring antibiotic treatment or
- Any MRI read of PI-RADS 2 or lower

## Data Acquisition

*Fill in all relevant information:*

| Study design | *Randomized controlled trial* |
| --- | --- |
| Data source/how the data were collected | *Study data will be prospectively collected from patient medical records and patient surveys. In all participating centers, the site-specific research coordinator will perform baseline data*  *acquisition and medical record abstraction. This data will be entered into standardized clinical*  *report forms housed within a REDCap environment and hosted by WCM. Each patient will be*  *assigned a unique study identifier.*  *REDCap (Research Electronic Data Capture) is a secure, web-based application designed*  *exclusively to support data capture for research studies. The REDCap platform will be*  *partitioned to permit read/write access only to site-specific records such that individual sites will*  *be able to access records for their own subjects, exclusively. REDCap has a secure email and*  *web-based data collection interface that may be utilized for collecting data. The site-specific*  *research coordinator will determine individual patients’ preferred method of survey response*  *and may collect survey data either through mail, telephone, REDCap, or during an in-person*  *visit.*  *Only the WCM research coordinator will be able to review de-identified data across sites to*  *conduct data quality checks and share data quality with the study biostatistician.*  *To ensure accuracy of data entered in the REDCap database from source documents (including*  *surveys and medical record abstract), sites will perform 100% visual review and conduct double*  *data entry for a sample (i.e., 10%) of the data.*  *Data quality checks will be conducted every 6 months, coinciding with Data Safety and*  *Monitoring reviews.*  *For protocol deviations fitting immediately reportable criteria, the DSMC’s primary concern lies*  *with whether the deviation has the potential to negatively impact subject safety or integrity of*  *study data or whether the deviation places subjects at greater risk of harm (including physical,*  *psychological, economic or social harm). If the DSMC makes determinations that the reported*  *protocol deviation impacts either, it may recommend modifications, suspension or termination of*  *the study.*  *Interim study findings will be communicated in cases where modifications are recommended.*  *The DSMC will require the PI to submit confirmation to the DSMC that the modification(s) have*  *been made, or to submit a reason why the PI did not agree with the DSMC’s recommendation.* |
| Contact information for team member responsible for data collection/acquisition | *Jim C. Hu MD MPH*  *525 E 68th Street, Starr 946*  *New York, NY 10065*  *Weill Cornell Medicine*  *Telephone 646.962.9600*  *Fax 646.962.0715*  *jch9011@med.cornell.edu* |
| Date or version (if downloaded, provide date) | *1.0* |
| Data transfer method and date | *7/10/2024, BRANY IRB access to REDCap database* |
| Where dataset is stored | *Weill Cornell REDCap* |

# Outcomes, Exposures, and Additional Variables of Interest

## Primary Outcome(s)

| **Outcome** | **Description** | **Variables and Source** | **Specifications** |
| --- | --- | --- | --- |
| To compare the rates of overall and clinically significant prostate cancer by PI-RADS lesion for Asian men | MRI lesions by PI-RADS score – Asian men vs. White men | Age  Biopsy approach  PI-RADS  PSA  Grade Group  Race | Age - continuous  Biopsy approach – categorical (TP vs. TR)  PI-RADS – categorical (3 vs. 4 vs. 5)  PSA - continuous  Grade Group – categorical (benign vs. GG1 vs. GG2 and higher)  Race – categorical (Asian vs. White, Black vs. White) |
| To compare the rates of overall and clinically significant prostate cancer by PI-RADS lesion for Black men | MRI lesions by PI-RADS score – Black men vs. White men | Age  Biopsy approach  PI-RADS  PSA  Grade Group  Race | Age - continuous  Biopsy approach – categorical (TP vs. TR)  PI-RADS – categorical (3 vs. 4 vs. 5)  PSA - continuous  Grade Group – categorical (benign vs. GG1 vs. GG2 and higher)  Race – categorical (Asian vs. White, Black vs. White) |

## Secondary Outcome(s)

None

# Statistical Analysis Plan

1. For continuous variables, we will use Shapiro-Wilk test to assess normality. We will then use Kruskal-Wallis and one-way ANOVA tests as appropriate to compare continuous variables across racial groups; for comparisons that are found to be significantly different across racial groups, we will then perform subsequent pairwise Wilcoxon or t-tests, respectively, with Bonferroni correction applied to adjust for multiple comparisons. Fisher’s exact test will be used to compare categorical variables.
2. For the subset of patients who had a PI-RADS 3 or 4 lesions (considered to be intermediate to high risk under PI-RADS), we will create separate multivariable logistic regression models with the outcome of interest as either any PCa detection or csPCa. We used these models to assess for possible associations between patient reported race and these outcomes of interests. Variables were included in our model by consensus from our study team based on likelihood of association with cancer detection.
3. Cutoff for clinical significance for all analyses was p<0.05. All statistical analysis was conducted in R version 4.4.2.

## Demographic and Clinical Characteristics (“Table 1”)

1. Table 1: Baseline patient characteristics and biopsy outcomes for all patients with PIRADS 3-5 lesions by race

|  | **Asian**  **(n=36)** | **Black**  **(n=88)** | **White (n=414)** | **Overall**  **(n=665)** | **p-value** |
| --- | --- | --- | --- | --- | --- |
| **Age**, median (IQR) | 67 (61-70) | 62 (58.5-68)e | 66.5 (61-71.5) | 66 (61-71) | 0.001 |
| **Biopsy approach**, n (%) |  |  |  |  | 0.6 |
| Transrectal | 19 (53) | 44 (50) | 192 (46) | 320 (48) |  |
| Transperineal | 17 (47) | 44 (50) | 222 (54) | 345 (52) |  |
| **PSAa**, median (IQR) | 5.88 (4.53-8.38) | 6.50 (5.00-9.75)e | 5.53 (4.33-7.47) | 5.79 (4.48-8.00) | 0.02 |
| **PSADb**, median (IQR) | 0.13 (0.09-0.24) | 0.17 (0.11-0.31)e | 0.13 (0.09-0.20) | 0.14 (0.09-0.21) | 0.01 |
| **PI-RADSc**, n (%) |  |  |  |  | 0.3 |
| 3 | 7 (19) | 20 (23) | 100 (24) | 153 (23) |  |
| 4 | 16 (44) | 50 (57) | 196 (47) | 319 (48) |  |
| 5 | 13 (36) | 18 (20) | 118 (29) | 193 (29) |  |
| **Highest Grade Groupd**, n (%) |  |  |  |  | 0.11 |
| Benign | 14 (39) | 14 (16) | 117 (28) | 177 (27) |  |
| GG1 | 3 (8) | 15 (17) | 74 (18) | 102 (15) |  |
| GG2 | 8 (22) | 30 (34) | 121 (29) | 208 (31) |  |
| GG3 | 5 (14) | 14 (16) | 47 (11) | 81 (12) |  |
| GG4 | 2 (6) | 5 (6) | 20 (5) | 34 (5) |  |
| GG5 | 4 (11) | 10 (11) | 35 (9) | 63 (9) |  |

1. aProstate-specific antigen
2. bProstate-specific antigen density
3. cProstate Imaging Reporting and Data System
4. dGrade Group
5. **e**All are p<0.01 when compared to White cohort
6. Example Figure 1

Figure 1.Detection of overall prostate cancer stratified by PI-RADS and race.


## Analyses Plan for Aim 1

Logistic regression model formula:

logit(p) = β₀ + β₁ * Transperineal Biopsy + β₂ * Age+ β₃ * PSAD + β₄ * Asian Race + β₅ * Black race + β₆ * Other Race + β₇ * PI-RADS 4

Where:

- logit (p) is the log-odds probability of the outcome of clinically significant cancer.
- Transperineal biopsy is binary variable comparing transperineal to transrectal biopsy as reference group
- Age is continuous in years
- PSAD is continuous variable representing PSA density
- Asian, Black, and other race are categorical variables compared to White race as reference
- PI-RADS 4 is a categorical variable comparing a PI-RADS 4 score to PI-RADS score of 3 as a reference.

The outcome of interest will be odds ratios with the associated 95% confidence interval for those ratios.

# Limitations

# By including only patients from the original PREVENT trial with PI-RADS 3 or greater lesions on MRI, the sample size of Asian and Black men will be smaller.

# The PREVENT trial was powered to detect differences in infection rate, not cancer detection. As such, this study may be underpowered to detect differences in cancer detection.

# 7 Appendix

*N/A*

Statistical Analysis Plan Checklist

*Below you will find a checklist of recommended items to include in a statistical analysis plan. Some of these are specific to clinical trials (based on this* [*JAMA paper*](https://jamanetwork.com/journals/jama/fullarticle/2666509)*) and some are other are specific to observational studies (based on* [*STROBE*](https://www.strobe-statement.org/index.php?id=available-checklists)*/*[*RECORD*](http://www.record-statement.org/) *guidelines), so every item will not be necessary for every project. The biostatistician should start with the SAP template above and add in necessary information from the checklist. Item numbers that are starred (*) are not explicitly included in the SAP template and should be added by the author if relevant to the project. This checklist was developed using the* [*CONSORT 2010 Checklist*](http://www.consort-statement.org/)*.*

1Turner L, Shamseer L, Altman DG, et al. Consolidated standards of reporting trials (CONSORT) and the completeness of reporting of randomised controlled trials (RCTs) published in medical journals. *Cochrane Database Syst Rev*. 2012;11:MR000030. Published 2012 Nov 14. doi:10.1002/14651858.MR000030.pub2

| Section/Topic | Item # | Description | Included  (Yes/No/NA) |
| --- | --- | --- | --- |
| Administrative Information | | | |
| Study Information | 1a | Descriptive title that matches the protocol, with SAP either as a forerunner or subtitle | Yes |
| 1b | Trial registration number, protocol version number, and/or IRB number. | Yes |
|  | 1c | CRU/Department/Division/Center/other collaborative unit that the study falls under | Yes |
| Roles and responsibility | 2a | Listing of principal investigators, clinical leads, and co-authors (if known) | Yes |
| 2b | Name and affiliation of SAP author(s) | Yes |
|  | 2c | Names, affiliations, and roles of other SAP contributors (e.g. senior statistician) | Yes |
| SAP Information | 3 | SAP version number, with date of current version and original creation date | Yes |
| Project Information | 4a | Project folder location | Yes |
|  | 4b | Project goals (e.g. manuscript, abstract, presentation, etc.) | Yes |
|  | 4c | Project deadlines (of listed goals) | Yes |
|  | 4d | Effort estimate | No |
| **Investigator Agreement** | | | |
| Investigator Agreement | 5 | Confirmation that BERD Method Core’s collaborative process has been reviewed, that all statistical analyses included in an abstract or manuscript should reflect the SAP, no changes should be made to the SAP without discussing with the SAP author, all biostatisticians on the SAP are co-authors on the manuscript, and that publications resulting from the SAP must cite grant number UL1TR002553 and be submitted to PubMed Central | Yes |
| Signatures | 6 | Signatures of SAP author, senior statistician, and principal investigator(s) | Yes |
| **Activity Log** | | | |
| SAP revisions | 7a | SAP revision history with dates | NA |
|  | 7b | Justification for each SAP revision | NA |
|  | 7c* | Timing of SAP revision in relation to any interim analyses or submissions | NA |
| Study Overview | | | |
| Background and introduction | 8 | Synopsis of scientific background and rationale for the study | Yes |
| Aims and Hypotheses | 9a | List of all scientific aims/objectives of the study, with specifications of primary, secondary, etc. | Yes |
| 9b | List of all statistical hypotheses (corresponding to the scientific aims), with specifications of primary, secondary, etc. | Yes |
| Variables of Interest | 10a | List of all outcome/endpoint variables, with a description of their coding/units, timing, and source, corresponding to the statistical hypotheses. If any variables are defined using ICD or CPT codes, list them out. | Yes |
|  | 10b | List of all exposure variables, with a description of their coding/units, timing, and source, corresponding to the statistical hypotheses. If any variables are defined using ICD or CPT codes, list them out. | Yes |
|  | 10c | List of any additional variables of interest (e.g. covariates, potential confounders, effect modifiers, etc.) in the analysis | Yes |
|  | 10d* | Location of data dictionary (or provided as an appendix) | Yes |
|  | 10e* | Report category boundaries if continuous variables are collapsed into categories, and describe any other relevant data transformations | Yes |
| Causal Graph | 11* | May be helpful to include a DAG or other graph/diagram that describes the way the variables of interest are presumed to relate to each other | No |
| **Study Methods** | | | |
| Study Plan and Design | 12a | Description of the study design (e.g. parallel group randomized trial, case-control study, cohort study, etc.) | Yes |
| 12b* | Study setting, location, and relevant dates (e.g. periods of enrolment, exposure, follow-up, and collection) | Yes |
| 12c* | Description of intervention or exposure groups, with allocation ratios, and details of any matching criteria | Yes |
| 12d* | Details on randomization (e.g. stratification factors) and blinding procedures | Yes |
| 12e | List of eligibility and/or inclusion/exclusion criteria | Yes |
| 12f* | Description of screening/enrolment/recruitment processes | Yes |
| 12g* | Description of patient flow (e.g. CONSORT diagram) | Yes |
| 12h* | Description of analysis population (e.g. intention to treat, per protocol, etc.) | Yes |
| 12i* | Definitions of adherence/compliance, protocol deviations, loss-to-follow-up, adverse events, etc. | Yes |
| 12j* | Time points at which outcomes are measured | Yes |
| 12k* | Timing of final analyses (are all outcomes analysed collectively, or will short-term outcomes be analysed separately from long-term outcomes, etc.) | Yes |
| Sample Size | 13a* | Sample size calculation or justification (either provided in full or summarized, with link to original source) | Yes |
|  | 13b* | Description of pre-planned subgroup analyses, power for these analyses, and planned multiple comparison adjustment procedures | Yes |
| Interim Analyses | 14a* | Description of what interim analyses will be conducted at which time points, and what methods used to adjust significance levels due to the interim analysis | Yes |
|  | 14b* | Details of any guidelines (e.g. safety, futility) for stopping the study early | NA |
|  | 14c* | Details of any changes to trial design due to interim analyses (e.g. enrolling more patients) | NA |
| Data | 15a | Description of data collection/acquisition process, with contact information for team member responsible | Yes |
|  | 15b | Description of data flow/transfer from primary data collection through to creation of final analysis dataset | Yes |
|  | 15c | Data transfer method and date | Yes |
|  | 15d | Folder location where datasets are stored | Yes |
|  | 15e* | Description of any additional data management, quality control, or processing undertaken | Yes |
|  | 15f* | If any data are extracted from a database, a description of the database and the query used for the extraction, and whether/how it was merged with any data from outside that database. If the study involved linkage of databases, consider use of a flow diagram to demonstrate the data linkage process, including the number of individuals with linked data at each stage. | Yes |
|  | 15f* | Description of any other data sources incorporated in the analysis | Yes |
| Missing Data | 16a* | Description of sources and magnitudes of missing data | NA |
|  | 16b* | Description of how missing data patterns will be presented/summarized (may be helpful to have a table shell or draft CONSORT-style diagram) | NA |
|  | 16c* | Description of contingency plans for handling missing data in analysis | NA |
| Simulations | 17a* | If conducting a simulation, a description of the purpose of the simulation and its design (e.g. fully factorial, partially factorial, grid search, etc.) | NA |
|  | 17b* | Define the fixed and variable factors or parameters in the simulation, the estimands/targets of the simulation, and the performance measures to be estimated (with justifications of their relevance to the estimands/targets) | NA |
|  | 17c* | Description of the tabular and graphical presentations of simulation results and their interpretation | NA |
| **Statistical Analysis Plan** | | | |
| Statistical Significance | 18a* | Hypothesis testing framework (e.g. superiority, equivalence, non-inferiority), or description of alternative analytic framework (e.g. evaluation of a posterior in a Bayesian analysis, etc.) | Yes |
| 18b* | Level of significance for primary hypotheses, including a description and rationale for any multiple comparisons adjustment or Type I error control procedures | Yes |
|  | 18c* | Description of any decision-making rules based on confidence intervals, credible intervals, prediction intervals, Bayes’ factors, or other alternative inferential methods | Yes |
|  | 18d* | Description of how the results of any hypothesis tests (or alternative inferential methods) will be interpreted with respect to both the statistical hypotheses and scientific aims/objectives of the study | Yes |
| Descriptive Statistics | 19a* | List of characteristics (e.g. demographic, clinical) to be summarized descriptively (e.g. “Table 1”) | Yes |
|  | 19b* | Description of how these characteristics will be summarized descriptively (e.g. means/medians vs. N (%), tabular displays, graphical displays, etc.) | Yes |
|  | 19c* | Summarize follow-up time (e.g. average and total amount) and number of events | NA |
| Analysis Methods | 20a | For each aim/hypothesis (see items 9a/9b), a description of what analysis method will be used and how the results from this method will be reported and interpreted | Yes |
|  | 20b* | Description of any transformations, standardizations, covariate or confounder adjustments, weighting, or stratification methods to be used and why. | Yes |
|  | 20c* | For each analytic method proposed, a description of the assumptions of that method and what processes will be used to evaluate whether or not those assumptions hold | Yes |
|  | 20d* | Details of contingency plans/alternative methods to be used if the assumptions are found not to hold | No |
|  | 20e* | In the case of non-standard test statistics, formulas provided for the test statistic with a description of the mathematical null hypothesis, how significance is determined, and how the test statistic is interpreted | NA |
|  | 20f* | In the case of regression models, formulas provided for the full model with a description of which parameters are to be used, how they will be interpreted, how confidence intervals will be constructed, etc. | Yes |
|  | 20g* | In the case of survey, hierarchical/nested, or clustered data, a description of what methods will be used to adjust for the data structure and why (e.g. if using a GEE, describing which correlation structure and why it was chosen, etc.) | NA |
|  | 20h* | For non-continuous outcomes, clearly explain the effect used (e.g. risk difference, risk ratio, odds ratio, etc.), whether it is relative or absolute, and justify why that was chosen as the effect measure of interest | Yes |
|  | 20i* | Documentation of any non-standard methods used (e.g. using alternative degree of freedom calculation methods, using a non-canonical link function, etc.) | NA |
|  | 20j* | Description of any limitations, sources of bias, internal/external validity, and other relevant discussions concerning the interpretation and generalizability of the design or methods used | Yes |
| Additional Analysis Methods | 21a* | Description of any pre-planned sensitivity analyses and how they will be interpreted | NA |
| 21b* | Description of pre-planned subgroup analyses, power for these analyses, and planned multiple comparison adjustment procedures | Yes |
| 21c* | Description of any additional post-hoc calculations or analyses (e.g. evaluating interaction/modification effects, calculating mediation or local average treatment effects, evaluation of AUROC curves, etc.) | NA |
|  | 21d* | If conducting any bootstrap analyses, a description of the sampling algorithm and number of iterations used | NA |
|  | 21e* | If conducting any cross-validation procedures, a description of how the cross-validation is conducted (e.g. leave-one-out, train/validation/test, etc.) | NA |
| Exploratory Analyses | 22a* | Description and justification for any pre-planned exploratory analyses and what methods will be used to conduct them | NA |
|  | 22b* | Framework for conducting any unplanned exploratory analyses and how they will be integrated into the planned analysis | NA |
| Software | 23* | List of statistical software (along with version numbers) to be used for each phase of the analysis; in the case of R or Stata, additionally list any requisite installed packages and their version numbers | Yes |
| Other | 24* | Description of any additional planned analyses of the data (e.g. a safety analysis looking at adverse event rates for a Data Safety Monitoring Board, etc.) | NA |
| **Tables and Figures** | | | |
| Table Shells | 25* | Example tables related to any of the conducted analyses; if possible including any available preliminary data | Yes |
| Example Figures | 26* | Example figures related to any of the conducted analyses; if possible including any available preliminary data. | Yes |
| **References** | | | |
| References | 27a | References for any non-standard statistical methods used | NA |
|  | 27b | References (and locations) for any relevant protocols, standard operating procedures, or other documents cited in the SAP | NA |
| **Additional Information** | | | |
| Appendices | 28* | If necessary, appendices may be included (e.g. a full data dictionary, a copy of a Case Report Form, etc.) | NA |
| Addendums | 29* | Any additional analyses conducted that were not included in the SAP should be documented in an addendum, describing the purpose of the additional analysis, when it was conducted, and by whom | NA |
|  |  |  |  |
