# Supplementary material for: Evaluating PI-RADS lesions and clinically significant prostate cancer in Black and Asian men: a PREVENT randomized clinical trial secondary analysis.
Source: Research Square preprint supplement (doi:10.21203/rs.3.rs-6905600/v1), 2025-07-04
Supplement: Supplementary file 6 [file d525f3ab54d8a7ad7fa0eb6d.xlsx]

## Sheet: Sheet1
Table 1: Baseline patient characteristics and biopsy outcomes for all patients with PIRADS 3-5 lesions by race
	Asian	Black	White (n=414)	Overall	p-value
	(n=36)	(n=88)		(n=665)
Age, median (IQR)	67 (61-70)	62 (58.5-68)e	66.5 (61-71.5)	66 (61-71)	0.001
Biopsy approach, n (%)					0.6
Transrectal	19 (53)	44 (50)	192 (46)	320 (48)
Transperineal	17 (47)	44 (50)	222 (54)	345 (52)
PSAa, median (IQR)	5.88 (4.53-8.38)	6.50 (5.00-9.75)e	5.53 (4.33-7.47)	5.79 (4.48-8.00)	0.02
PSADb, median (IQR)	0.13 (0.09-0.24)	0.17 (0.11-0.31)e	0.13 (0.09-0.20)	0.14 (0.09-0.21)	0.01
PI-RADSc, n (%)					0.3
3	7 (19)	20 (23)	100 (24)	153 (23)
4	16 (44)	50 (57)	196 (47)	319 (48)
5	13 (36)	18 (20)	118 (29)	193 (29)
Highest Grade Groupd, n (%)					0.11
Benign	14 (39)	14 (16)	117 (28)	177 (27)
GG1	3 (8)	15 (17)	74 (18)	102 (15)
GG2	8 (22)	30 (34)	121 (29)	208 (31)
GG3	5 (14)	14 (16)	47 (11)	81 (12)
GG4	2 (6)	5 (6)	20 (5)	34 (5)
GG5	4 (11)	10 (11)	35 (9)	63 (9)
aProstate-specific antigen
bProstate-specific antigen density
cProstate Imaging Reporting and Data System
dGrade Group
eAll are p<0.01 when compared to White cohort
